# Supplementary material for: Proteomics of Two Thermotolerant Isolates of Trichoderma under High-Temperature Stress
Source: J Fungi (Basel). 2021 Nov 24;7(12):1002. doi: 10.3390/jof7121002 (PMC8704589; doi:10.3390/jof7121002)
Supplement: Supplementary file 1 [file jof-07-01002-s001.zip]

Archive with 4 entries (4 files):
- Fig S1.pdf
- Table S1.pdf
- Table S2.pdf
- Table S3.pdf
