# Supplementary material for: Proteomics of Two Thermotolerant Isolates of Trichoderma under High-Temperature Stress
Source: J Fungi (Basel). 2021 Nov 24;7(12):1002. doi: 10.3390/jof7121002 (PMC8704589; doi:10.3390/jof7121002)
Supplement: Supplementary file 1 [file jof-07-01002-s001.zip › Table S1.pdf]

**Table S1.** List of accession numbers of thermotolerant *Trichoderma* isolates

| <b>Isolate</b>                          | <b>Accession numbers</b> |                          |
|-----------------------------------------|--------------------------|--------------------------|
| Gene                                    | TEF1 $\alpha$            | RNA Polymerase subunit B |
| <i>T. asperellum</i> 7316, TaDOR7316    | KM190858                 | KX389492                 |
| <i>T. longibrachiatum</i> 673, TaDOR673 | KM190859                 | KX389493                 |
