# Supplementary material for: Proteomics of Two Thermotolerant Isolates of Trichoderma under High-Temperature Stress
Source: J Fungi (Basel). 2021 Nov 24;7(12):1002. doi: 10.3390/jof7121002 (PMC8704589; doi:10.3390/jof7121002)
Supplement: Supplementary file 1 [file jof-07-01002-s001.zip › Table S2.pdf]

**Table S2.** BLASTP and CDD (Conserved domain) analyses of protein identified during heat stress in *T. longibrachiatum* 673, TaDOR673

| Expression Pattern                               | Spot no. | NCBI Hit of BlastP against <i>Trichoderma</i>                                | Fold-regulation |        | Conserved domains                                                | Accession No.                  | Score | E-value | %Identity |
|--------------------------------------------------|----------|------------------------------------------------------------------------------|-----------------|--------|------------------------------------------------------------------|--------------------------------|-------|---------|-----------|
|                                                  |          |                                                                              | 1 h             | 4 h    |                                                                  |                                |       |         |           |
| Downregulated in 1 h and 4 h compared to control | 871      | hsp60 mitochondrial precursor-like protein [ <i>Trichoderma reesei</i> QM6a] | -4.7            | -16.48 | GroEL domain                                                     | <a href="#">XP_006961679.1</a> | 140   | 2e-40   | 86%       |
|                                                  | 727      | hypothetical protein TRIVIDRAFT_185457 [ <i>Trichoderma virens</i> Gv29-8]   | -1.07           | -1.5   | FES1 and ARM domain                                              | EHK27263.1                     | 143   | 2e-40   | 44%       |
|                                                  | 737      | predicted protein [ <i>Trichoderma reesei</i> QM6a]                          | -2.0            | -3.9   | Helicase domains                                                 | XP_006961979.1                 | 716   | 0.0     | 49%       |
|                                                  | 553      | glia maturation factor beta [ <i>Trichoderma reesei</i> RUT C-30]            | -4.0            | -1.6   | Actin depolymerization factor/cofilin-like domains (ADF domains) | ETS05399.1                     | 95.9  | 1e-26   | 39%       |

|                                                                  |     |                                                                                   |      |      |                                                  |                |      |       |     |
|------------------------------------------------------------------|-----|-----------------------------------------------------------------------------------|------|------|--------------------------------------------------|----------------|------|-------|-----|
| Unique to control and absent in treated samples                  | CN2 | hypothetical protein TRIATDRAFT_38099 [ <i>Trichoderma atroviride</i> IMI 206040] | nd   | nd   | Phosphoadenosine phosphosulfate reductase family | EHK45271.1     | 184  | 4e-56 | 42% |
| Upregulated in 1 h compared to control and 4 h                   | 329 | phosphopyruvate hydratase [ <i>Trichoderma reesei</i> QM6a]                       | 4.43 | nd   | Enolase                                          | XP_006963341.1 | 795  | 0.0   | 88% |
| Upregulated in 1 h and down regulated in 4 h compared to control | 817 | predicted protein [ <i>Trichoderma reesei</i> QM6a]                               | 1.95 | -1.0 | PWWP domain                                      | XP_006966270.1 | 51.6 | 1e-06 | 26% |
| Upregulated in 4 h compared to control                           | 576 | hypothetical protein TRIVIDRAFT_181102 [ <i>Trichoderma virens</i> Gv29-8]        | nd   | 7.28 | Oxidoreductase family                            | EHK20255.1     | 31.2 | 1.8   | 24% |
|                                                                  | 590 | glycosyltransferase family 8 protein [ <i>Trichoderma atroviride</i> IMI 206040]  | nd   | 3.0  | Glucosyl transferase 8 (GT8) family              | EHK46197.1     | 105  | 1e-24 | 23% |
|                                                                  | 351 | phosphopyruvate hydratase [ <i>Trichoderma reesei</i> QM6a]                       | nd   | 4.05 | Enolase superfamily                              | EHK50091.1     | 790  | 0.0   | 87% |

|                                                |     |                                                                                                |      |      |                                    |                |      |       |      |
|------------------------------------------------|-----|------------------------------------------------------------------------------------------------|------|------|------------------------------------|----------------|------|-------|------|
| Upregulated in 1 h and 4 h compared to control | 450 | predicted protein[ <i>Trichoderma reesei</i> QM6a]                                             | 2.51 | 2.0  | No conserved domains               | XP_006962894.1 | 260  | 1e-86 | 100% |
|                                                | 352 | hypothetical protein TRIVIDRAFT_30731 [ <i>Trichoderma virens</i> Gv29-8]                      | 1.2  | 10.2 | Signal receiver domain             | EHK24432.1     | 59.7 | 2e-09 | 29%  |
|                                                | 445 | heat shock factor-type DNA-binding domain-containing protein [ <i>Trichoderma reesei</i> QM6a] | 1.3  | 1.5  | Heat shock transcription factor    | XP_006965998.1 | 95.9 | 5e-20 | 27%  |
|                                                | 528 | Phosphopyruvate hydratase [ <i>Trichoderma reesei</i> QM6a]                                    | 1.47 | 2.2  | Enolase                            | XP_006963341.1 | 795  | 0.0   | 88%  |
|                                                | 732 | Glycosyltransferase family 4 protein [ <i>Trichoderma atroviride</i> IMI 206040]               | 2.43 | 3.42 | Glycosyltransferase group 1 family | EHK45433.1     | 233  | 4E-68 | 34%  |

nd: Not detected

1 h: Heat stress treatment at 48°C for 1 h

4 h: Heat stress treatment at 48°C for 4 h
