# Supplementary material for: Proteomics of Two Thermotolerant Isolates of Trichoderma under High-Temperature Stress
Source: J Fungi (Basel). 2021 Nov 24;7(12):1002. doi: 10.3390/jof7121002 (PMC8704589; doi:10.3390/jof7121002)
Supplement: Supplementary file 1 [file jof-07-01002-s001.zip › Table S3.pdf]

**Table S3.** BLASTP and CDD (Conserved domain) analyses of protein identified during heat stress in *T. asperellum* 7316, TaDOR7316

| Expression Pattern                       | Spot no. | NCBI Hit of BlastP of protein against <i>Trichoderma</i>                           | Fold-regulation |     | Conserved domains                                        | Accession No.   | Score | E-value | %Identity |
|------------------------------------------|----------|------------------------------------------------------------------------------------|-----------------|-----|----------------------------------------------------------|-----------------|-------|---------|-----------|
|                                          |          |                                                                                    | 1 h             | 4 h |                                                          |                 |       |         |           |
| Unique to 1 h treated samples            | 1B       | Intra-Golgi transport complex, subunit 6 [ <i>Trichoderma reesei</i> QM6a]         | -               | nd  | Conserved oligomeric complex (COG6)                      | XP_00696559 2.1 | 99.8  | 2e-21   | 21%       |
|                                          | 1C       | small heat shock protein [ <i>Trichoderma harzianum</i> ]                          | -               | nd  | Hsp20/alpha crystalline family                           | AAX55622.1      | 97.1  | 2e-24   | 37%       |
| Downregulated in 1 h compared to control | 485      | hypothetical protein TRIATDRAFT_301560 [ <i>Trichoderma atroviride</i> IMI 206040] | -2.9            | nd  | NAD(P)-binding Rossmann-like domain                      | EHK40773.1      | 855   | 0.0     | 77%       |
|                                          | 446      | DNA polymerase epsilon, catalytic subunit A [ <i>Trichoderma reesei</i> QM6a]      | -2.6            | nd  | DNA polymerase type-B epsilon subfamily catalytic domain | XP_00696481 9.1 | 2130  | 0.0     | 48%       |
|                                          | 922      | hypothetical protein TRIATDRAFT_87546                                              | -4.3            | nd  | No conserved domains                                     | EHK44512.1      | 22.3  | 4.8     | 86%       |

|                                                            |      |                                                                                             |      |     |                                                                                                                                                                              |                    |      |        |     |
|------------------------------------------------------------|------|---------------------------------------------------------------------------------------------|------|-----|------------------------------------------------------------------------------------------------------------------------------------------------------------------------------|--------------------|------|--------|-----|
|                                                            |      | [ <i>Trichoderma atroviride</i><br>IMI 206040]                                              |      |     |                                                                                                                                                                              |                    |      |        |     |
|                                                            | 452  | GTP cyclohydrolase<br>[ <i>Trichoderma reesei</i><br>QM6a]                                  | -2.3 | nd  | GTP cyclohydrolase II<br>(RibA)                                                                                                                                              | XP_00696766<br>8.1 | 728  | 0.0    | 68% |
| Upregulated<br>in 1 h and 4<br>h compared<br>to control    | 1026 | hypothetical protein<br>TRIATDRAFT_52866<br>[ <i>Trichoderma atroviride</i><br>IMI 206040]  | 2.2  | 4.2 | tRNA threonylcarbamoyl<br>adenosine modification<br>protein YeaZ; Inactive<br>homolog of metal-<br>dependent proteases<br>(COG1214); Glycoprotease<br>family (Peptidase_M22) | EHK50571.1         | 498  | 2e-176 | 69% |
|                                                            | 1067 | hypothetical protein<br>TRIATDRAFT_265826<br>[ <i>Trichoderma atroviride</i><br>IMI 206040] | 8.19 | 7.7 | mRNA capping enzyme<br>(pfam03291); SAM-<br>dependent<br>methyltransferases                                                                                                  | EHK44240.1         | 494  | 4e-168 | 58% |
| Upregulated<br>in 4 h<br>compared to<br>control and<br>1 h | 1095 | subtilisin like protease<br>[ <i>Trichoderma virens</i><br>Gv29-8]                          | nd   | 2.1 | Peptidase S8 family<br>domain in Protein<br>convertases;                                                                                                                     | EHK25893.1         | 564  | 0.0    | 43% |
| Unique to<br>control and<br>absent in                      | C7   | vacuolar sorting protein<br>[ <i>Trichoderma reesei</i><br>QM6a]                            | nd   | nd  | Non-viral sialidases;<br>VPS10 domain                                                                                                                                        | XP_00696251<br>8.1 | 1559 | 0.0    | 53% |

|                                                   |     |                                                                                                                                      |       |       |                                                            |                        |           |             |          |
|---------------------------------------------------|-----|--------------------------------------------------------------------------------------------------------------------------------------|-------|-------|------------------------------------------------------------|------------------------|-----------|-------------|----------|
| treated samples                                   | C8  | Serine/threonine-protein phosphatase 2B catalytic subunit [ <i>Trichoderma reesei</i> RUT C-30]                                      | nd    | nd    | PP2B, metallophosphatase domain                            | ETS03163.1             | 828       | 0.0         | 78%      |
| Down regulated in 4 h compared to control         | 901 | predicted protein [ <i>Trichoderma reesei</i> QM6a]                                                                                  | nd    | -1.14 | Mitochondrial PGP phosphatase                              | XP_006964630.1         | 181       | 2e-57       | 50%      |
| Upregulated in 1 h compared to control            | 904 | tripeptidyl-peptidase 1 precursor [ <i>Trichoderma reesei</i> RUT C-30]                                                              | 2.4   | nd    | Peptidase domain in the S53 family                         | ETR98149.1             | 377       | 4e-122      | 41%      |
|                                                   | 856 | hypothetical protein TRIVIDRAFT_213745 [ <i>Trichoderma virens</i> Gv29-8]                                                           | 2.7   | nd    | chromosome segregation protein SMC; Autophagy protein Apg6 | EHK19294.1             | 434       | 1e-143      | 45%      |
| Down regulated in 1 h and 4 h compared to control | 920 | vacuolar serine protease [ <i>Trichoderma atroviride</i> ]                                                                           | -4.18 | -7.8  | Peptidase S8 family domain                                 | ABG57252.1             | 642       | 0.0         | 65%      |
|                                                   | 984 | hypothetical protein TRIVIDRAFT_209259 [ <i>Trichoderma virens</i> Gv29-8]; antiviral helicase [ <i>Trichoderma reesei</i> RUT C-30] | -6.2  | -3.7  | DEAD-like helicases superfamily                            | EHK22776.1; ETS02258.1 | 1116; 427 | 0.0; 8e-130 | 49%; 41% |

|  |     |                                                                              |      |      |                                                                   |                    |     |     |     |
|--|-----|------------------------------------------------------------------------------|------|------|-------------------------------------------------------------------|--------------------|-----|-----|-----|
|  | 794 | fructose biphosphate<br>aldolase [ <i>Trichoderma</i><br><i>reesei</i> QM6a] | -2.1 | -3.0 | Class II Type A, Fructose-<br>1,6-bisphosphate (FBP)<br>aldolases | XP_00696868<br>8.1 | 661 | 0.0 | 91% |
|--|-----|------------------------------------------------------------------------------|------|------|-------------------------------------------------------------------|--------------------|-----|-----|-----|

nd: Not detected

1 h: Heat stress treatment at 48°C for 1 h

4 h: Heat stress treatment at 48°C for 4 h
